# Supplementary material
Source: PubMed Central journal article supplement (PMC2944709)
Supplement: 1005446107_pnas.201005446SI.pdf [file 1005446107_pnas.201005446SI.pdf]

# Supporting Information

Mokeychev et al. 10.1073/pnas.1005446107

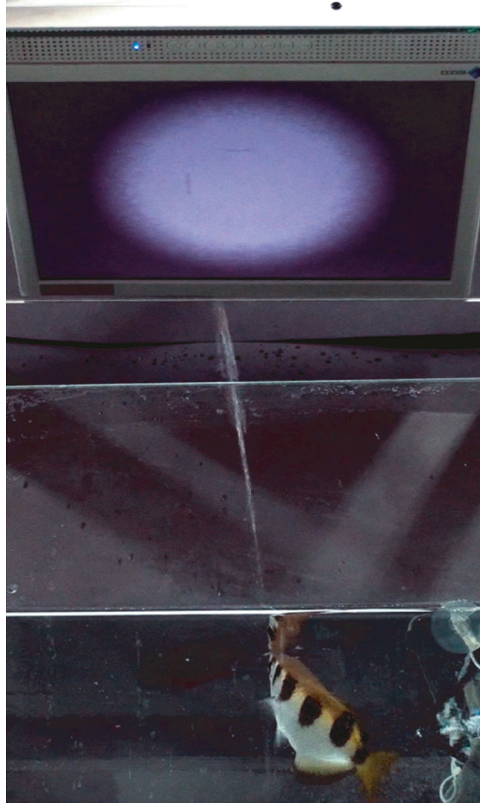

Movie S1. A sample experimental trial from our experiment.

[Movie S1](#)

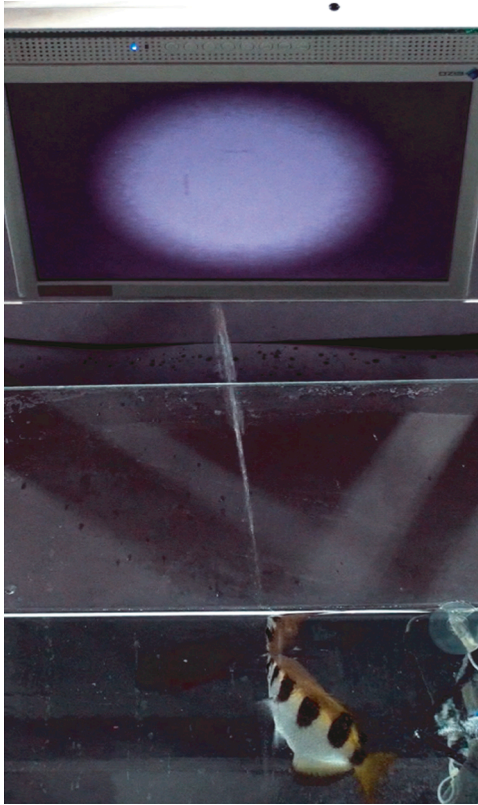

**Movie S2.** A sample experimental trial from our experiment.

[Movie S2](#)
